# Supplementary material
Source: Springer Nature journal article supplement (https://www.springermedizin.de/resource/supplementary/12974_2014_991_MOESM5_ESM.pdf/9600576)

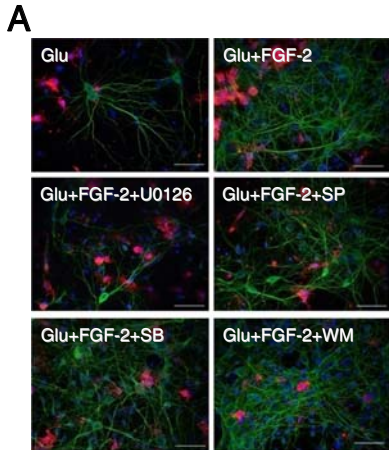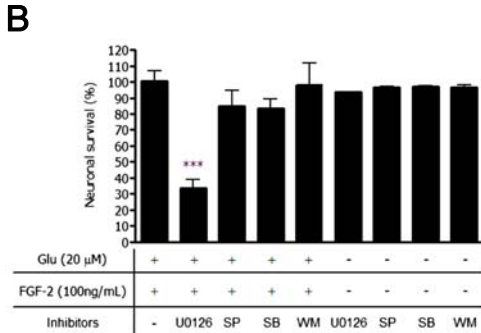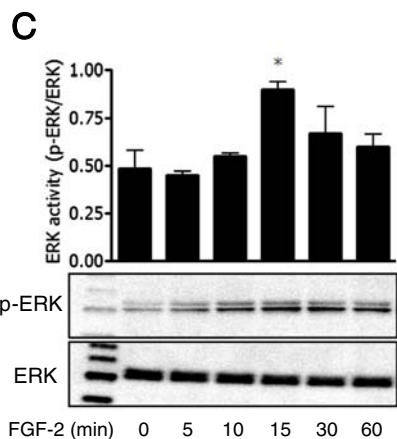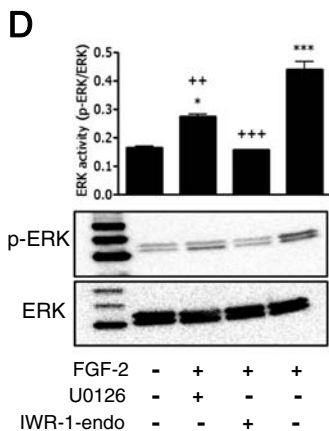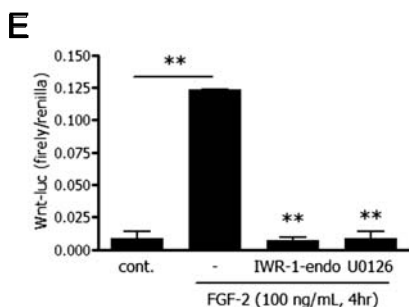

Supplement: MOESM5 [file 9600576]
